# Supplementary material for: Invasive Fish and Sea Urchins Drive the Status of Canopy Forming Macroalgae in the Eastern Mediterranean
Source: MDPI journal article supplement (doi:10.3390/biology12060763), 2023-05-24
Supplement: s1 [file s1]

**Table S1.** Generalized mixed models built with a binomial distribution and logit link function. Candidate models are ranked by the Akaike Information Criterion corrected for small samples (AICc).

| Model ID | Intercept | Alien H | Depth   | Native H | Sea urchins | df | Log-Likelihood | AICc  | $\Delta$ AICc | Weight |
|----------|-----------|---------|---------|----------|-------------|----|----------------|-------|---------------|--------|
| mod4     | 1.459     | -0.4567 | -0.246  |          | -0.6893     | 5  | -40.291        | 91.4  | 0             | 0.527  |
| mod1     | 1.494     | -0.4647 | -0.2457 | -0.01883 | -0.6893     | 6  | -40.287        | 93.8  | 2.35          | 0.163  |
| mod13    | 0.5418    |         | -0.2537 |          | -0.6204     | 4  | -42.868        | 94.3  | 2.86          | 0.126  |
| mod7     | 0.4362    | -0.3826 |         |          | -0.5117     | 4  | -43.558        | 95.7  | 4.24          | 0.063  |
| mod9     | 0.3097    |         | -0.2546 | 0.2222   | -0.6328     | 5  | -42.482        | 95.8  | 4.38          | 0.059  |
| mod3     | 0.4827    | -0.3928 |         | -0.02406 | -0.5128     | 5  | -43.551        | 98    | 6.52          | 0.02   |
| mod14    | -0.3739   |         |         |          | -0.3949     | 3  | -46.003        | 98.3  | 6.9           | 0.017  |
| mod11    | -0.5602   |         |         | 0.1774   | -0.4105     | 4  | -45.652        | 99.9  | 8.43          | 0.008  |
| mod15    | -0.2131   |         | -0.1546 |          |             | 3  | -47.274        | 100.9 | 9.44          | 0.005  |
| mod0     | -0.6822   |         |         |          |             | 2  | -48.749        | 101.7 | 10.22         | 0.003  |
| mod5     | 0.03222   | -0.152  | -0.1473 |          |             | 4  | -46.762        | 102.1 | 10.65         | 0.003  |
| mod8     | -0.3935   | -0.1636 |         |          |             | 3  | -48.106        | 102.5 | 11.11         | 0.002  |
| mod10    | -0.3045   |         | -0.1537 | 0.07316  |             | 4  | -47.197        | 103   | 11.52         | 0.002  |
| mod12    | -0.7776   |         |         | 0.07875  |             | 3  | -48.654        | 103.6 | 12.2          | 0.001  |
| mod2     | 0.06353   | -0.1584 | -0.1471 | -0.01667 |             | 5  | -46.758        | 104.4 | 12.94         | 0.001  |
| mod6     | -0.3566   | -0.1711 |         | -0.01934 |             | 4  | -48.101        | 104.8 | 13.33         | 0.001  |

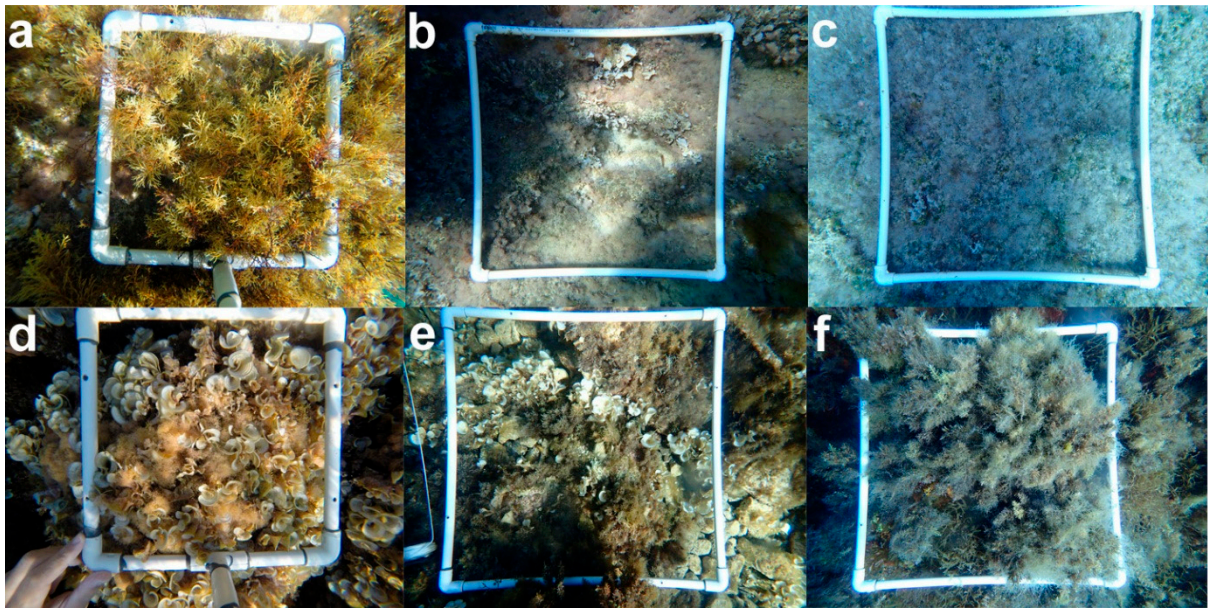

**Figure S1.** Photo-quadrat samples taken at stations CY2 and S2 and the quadrat scores based on the reef-EBQI index; (a) CY2 at the 0-0.5 m depth zone quadrat scored as 4, (b) CY2 at the 2 m depth zone quadrat scored as 1, (c) CY2 at the 8 m depth zone quadrat scored as 0, (d) S2 at the 0-0.5 m depth zone scored as 2, (e) S2 at the 2 m depth zone scored as 3 and (f) S2 at the 8 m depth zones scored as 4. Note that quadrats in pictures (a) and (d) are 25 x 25 cm and all others are 50 x 50 cm.

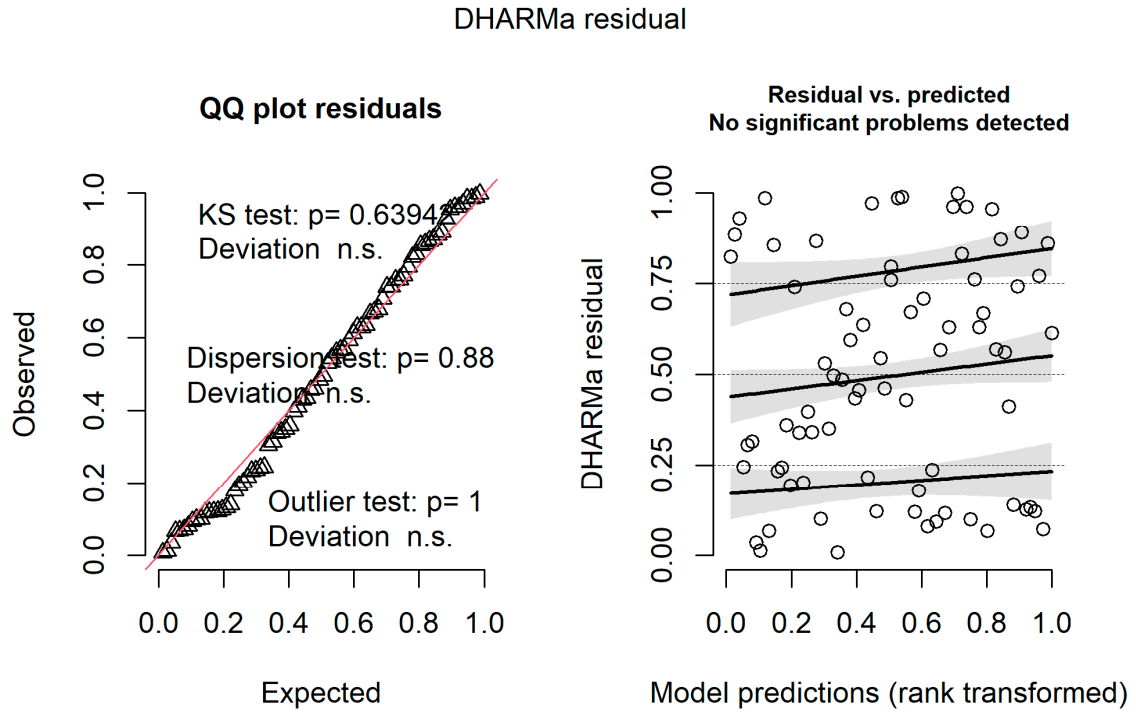

**Figure S2.** DHARMA diagnostics on the left Q-Q plot with added tests for corrected distribution (Kolmogorov-Smirnov test), dispersion and outliers. On the right residuals are plotted against the predicted value with quantile regression lines.

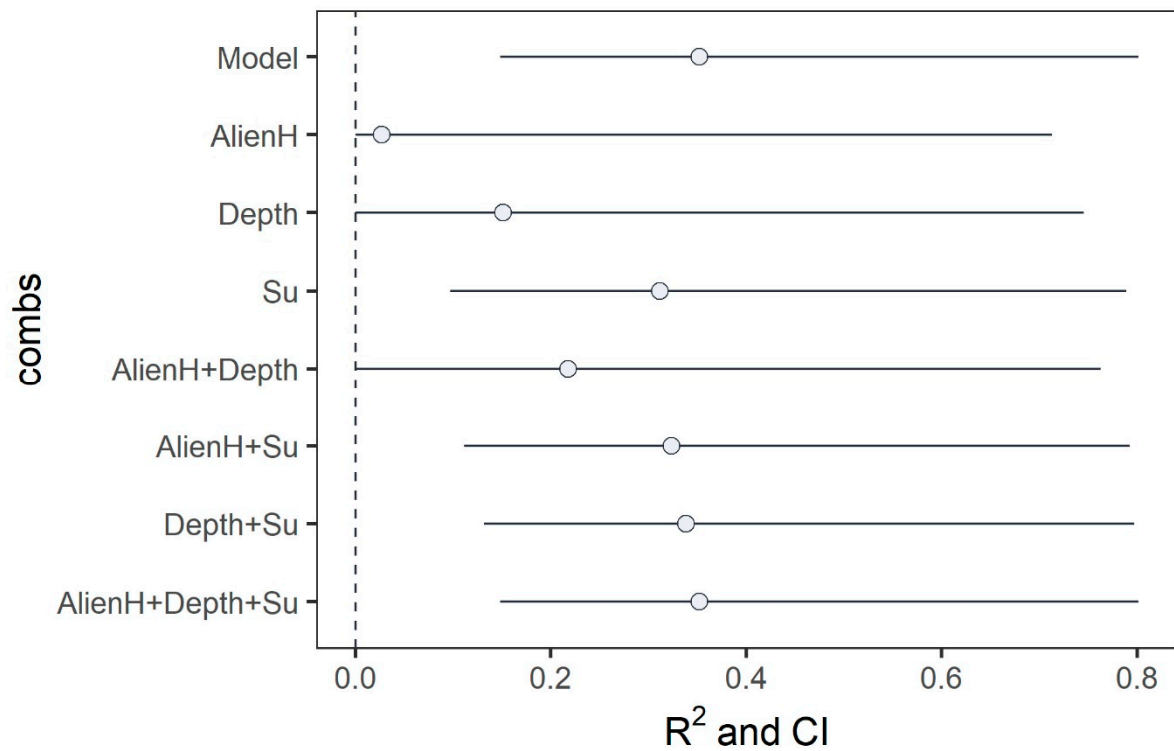

**Figure S3.** Forest plot for the best model displaying the estimated semi-partial  $R^2$  and related 95% confidence intervals for different independent variables and combinations.
